# Supplementary material for: Bone marrow-derived mesenchymal stem cells promote colorectal cancer progression via CCR5
Source: PubMed Central journal article supplement (PMC6424976; doi:10.1038/s41419-019-1508-2), 2019-03-19
Supplement: 41419_2019_1508_MOESM1_ESM.pdf [file 41419_2019_1508_MOESM1_ESM.pdf]

# Figure S1

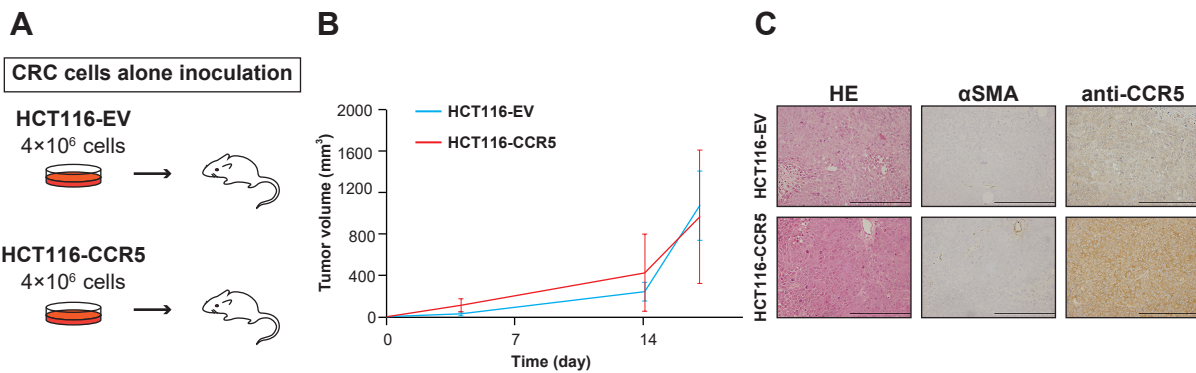

**Supplementary Figure S1.** Effect of CCR5 on the tumor growth in vivo.

**A** Schema of inoculation mice model. HCT116 transfectant cells were inoculated into mice. **B** Xenograft growth curves of HCT116-EV and HCT116-CCR5. Mean; bar, ± SE, n=6. **C** Histological findings of xenograft. H&E and immunohistochemical staining for αSMA and anti-CCR5. Scale bar, 200 μm.
